# Supplementary material for: A porphyrin-modified CoMoO4 nanosensor array for the detection of crude baijiu
Source: Royal Society of Chemistry journal article supplement (doi:10.1039/d4ay01082e), 2024-01-01
Supplement: d4ay01082e1.pdf [file d4ay01082e1.pdf]

## Supporting Information

### A porphyrin-modified CoMoO<sub>4</sub> nanosensor array for the detection of crude baijiu

Peng Zhao<sup>a</sup>, Xuhui Xia<sup>a</sup>, Yiyao Luo<sup>a</sup>, Zirui Yuan<sup>a</sup>, Jiayi Deng<sup>a</sup>, Huibo Luo<sup>b</sup> (1036884458@qq.com), Xiaogang Luo<sup>a\*</sup>, Danqun Huo<sup>a\*</sup>, Changjun Hou<sup>a,b\*</sup>

<sup>a</sup> Key Laboratory for Biorheological Science and Technology of Ministry of Education, Bioengineering College of Chongqing University, Chongqing 400044, PR China

<sup>b</sup> Liquor Making Biology Technology and Application of Key Laboratory of Sichuan Province, College of Bioengineering, Sichuan University of Science and Engineering, 188 University Town, Yi bin 644000, PR China

E-mail addresses: luosteel@cqu.edu.cn (X. Luo), huodq@cqu.edu.cn (D. Huo), houcj@cqu.edu.cn (C. Hou).

#### Preparation of CoMoO<sub>4</sub>

Typically, Na<sub>2</sub>MoO<sub>4</sub>•2H<sub>2</sub>O (1 mmol), Co(NO<sub>3</sub>)<sub>2</sub>•6H<sub>2</sub>O (1 mmol), urea (5 mmol) and NH<sub>4</sub>F (5 mmol) were successively added into a mixture of water (60 mL) to form a transparent solution under stirring for half an hour. Then, the solution is transferred and sealed in a 100 mL teflon-lined autoclave. After stored at 140 °C for 6 h, the CoMoO<sub>4</sub> products were collected by centrifugation, washed with deionized water and ethanol for several times, and vacuum dried at 80 °C for 12 h, followed by calcination at 300 °C for 2 h.

### **Preparation of Por-CoMoO<sub>4</sub>**

First, the porphyrins (3 mg) are dispersed into an alkaline aqueous solution (pH = 9, 10 mL) until completely dissolved. Thereafter, CoMoO<sub>4</sub> microspheres (60 mg) were poured into the above solution under ultrasound for 1 hour. The resulting material was then heated solvent-thermally in an oven at 110 °C for 120 minutes. Then, the prepared Por-CoMoO<sub>4</sub> nanocomposites were naturally cooled to room temperature and washed with deionized water and ethanol three times in turn. Finally, Por-CoMoO<sub>4</sub> is dried at 60 °C for 12 hours.

Table S1. Types of crude baijiu

| Number | Baijiu pit         | Baijiu grade        |
|--------|--------------------|---------------------|
| 1      |                    | First grade baijiu  |
| 2      | Guojiao workshop   | Second grade baijiu |
| 3      |                    | Third grade baijiu  |
| 4      |                    | Fourth grade baijiu |
| 5      |                    | First grade baijiu  |
| 6      | Luohan workshop    | Second grade baijiu |
| 7      |                    | Third grade baijiu  |
| 8      |                    | Fourth grade baijiu |
| 9      |                    | First grade baijiu  |
| 10     | Huangyi 1 workshop | Second grade baijiu |
| 11     |                    | Third grade baijiu  |
| 12     |                    | Fourth grade baijiu |
| 13     |                    | First grade baijiu  |
| 14     | Huangyi 2 workshop | Second grade baijiu |
| 15     |                    | Third grade baijiu  |
| 16     |                    | Fourth grade baijiu |

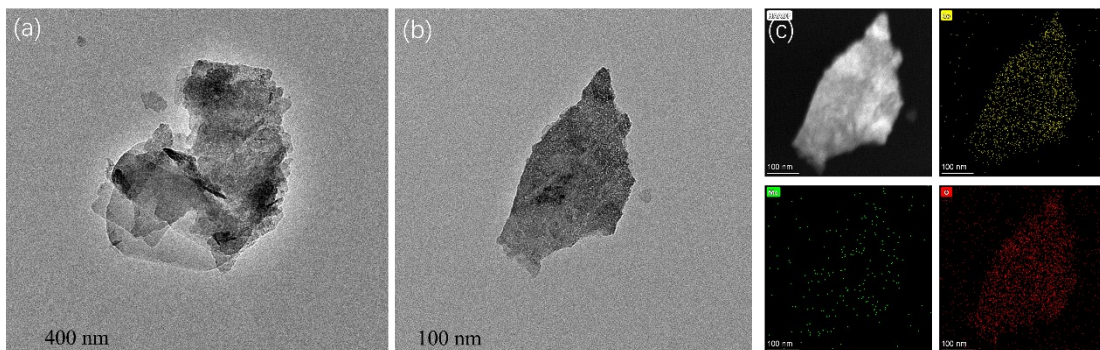

Fig. S1 (a) and (b) Por-CoMoO<sub>4</sub> TEM characterization. (c) Co、Mo、O element mapping

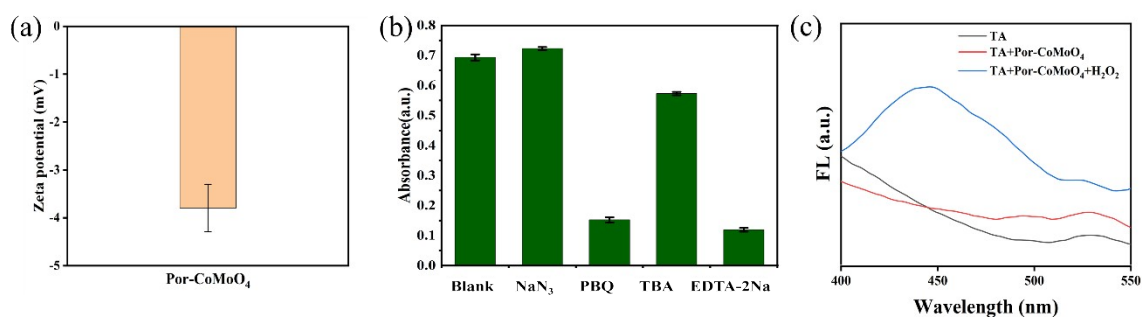

**Fig. S2** (a) Por-CoMoO<sub>4</sub> zeta potential. (b) Free radical scavenging experiments using NaN<sub>3</sub>, PBQ, TBA, EDTA. (c) Capture •OH fluorescence intensity assay using TA.

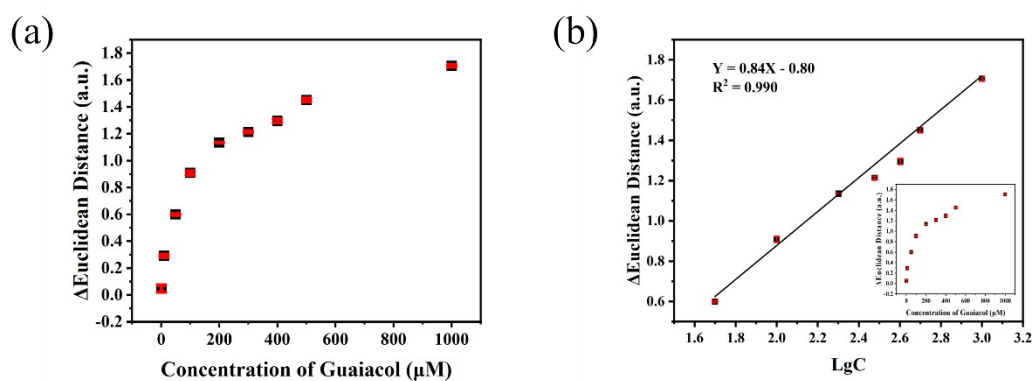

**Fig. S3** (a) Detection of different concentrations of guaiacol by array, Log-linear diagram of guaiacol. (b)

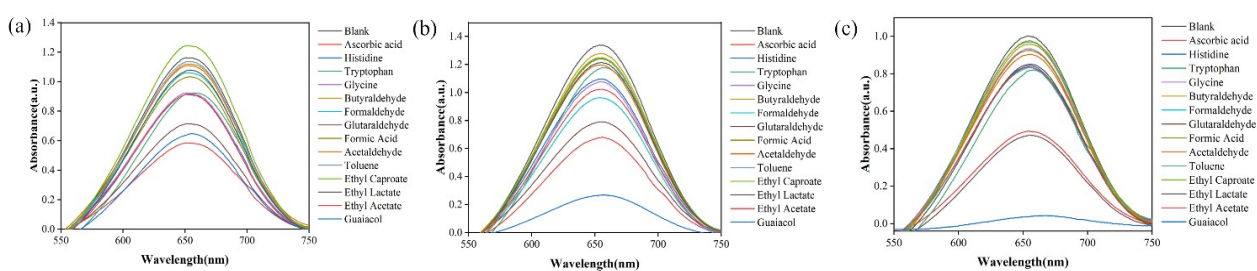

**Fig. S4** UV spectrum of 14 small molecules (a)-(c) (pH=3.6、4.4、5.2)

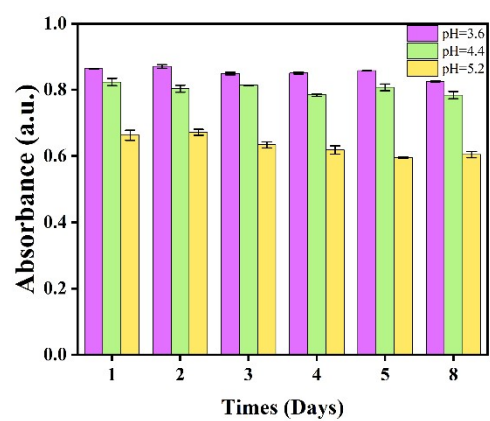

**Fig. S5** UV response of the colorimetric sensing array to the crude baijiu at different times.
